# Supplementary figures and images for: Genome-Wide Identification of Detoxification Genes in Wild Silkworm Antheraea pernyi and Transcriptional Response to Coumaphos
Source: MDPI journal article supplement (doi:10.3390/ijms24119775), 2023-06-05

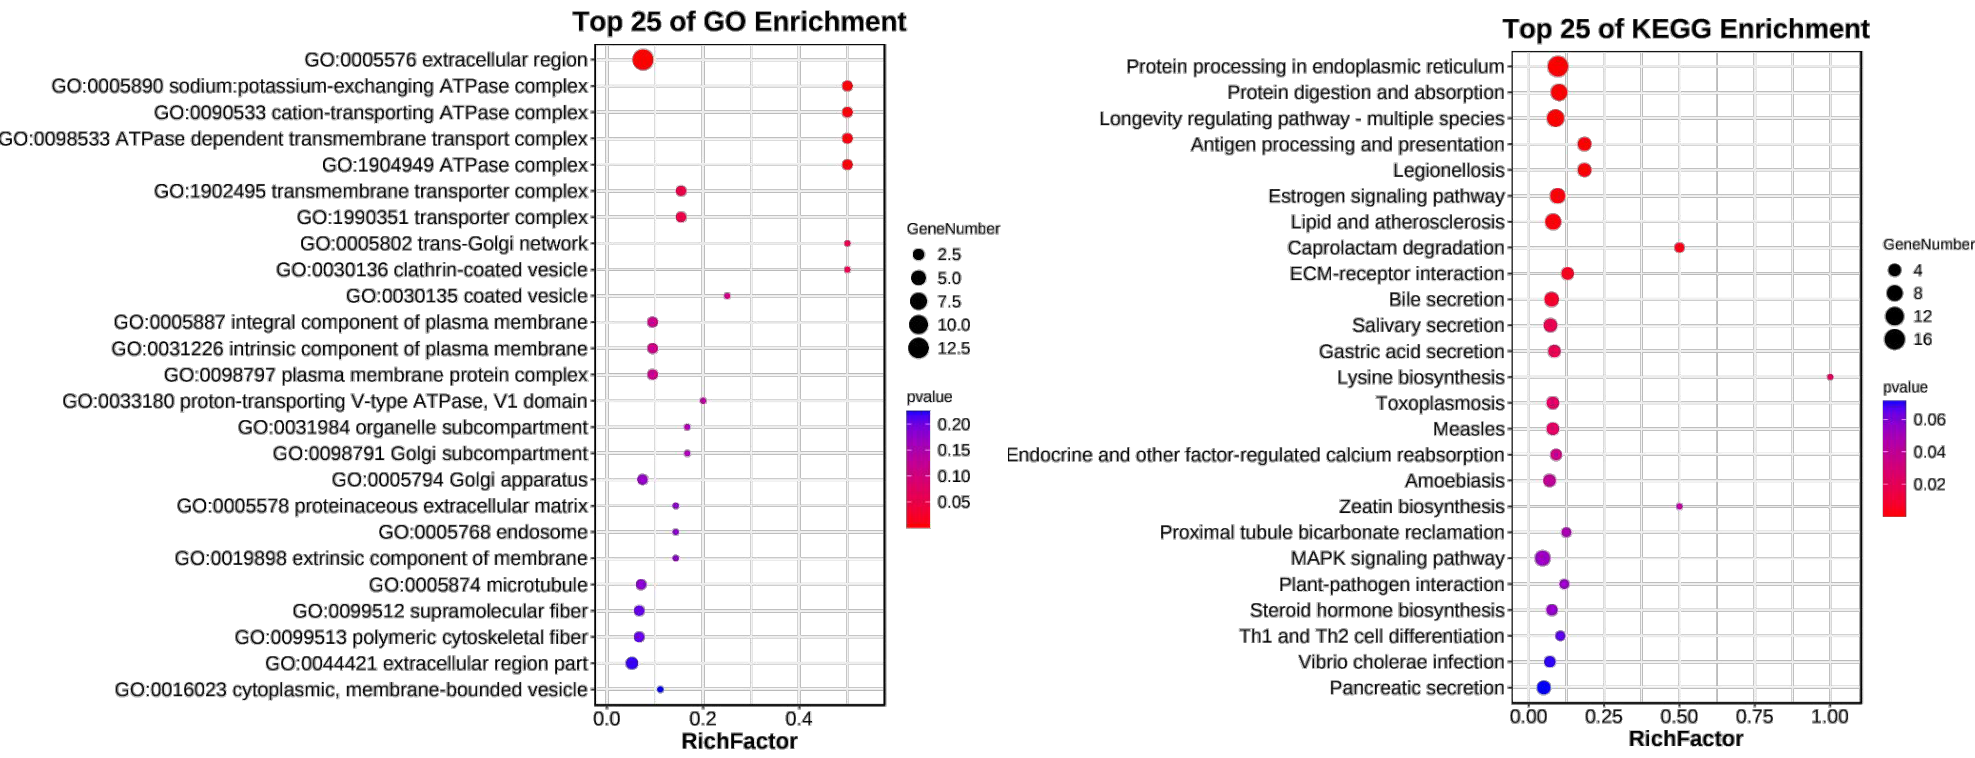

Supplement: s1 [file s1]
